# Supplementary material for: Modulation of the gut microbiota by a galactooligosaccharide protects against heavy metal lead accumulation in mice
Source: Royal Society of Chemistry journal article supplement (doi:10.1039/c9fo00587k), 2019-01-01
Supplement: c9fo00587k1.pdf [file c9fo00587k1.pdf]

## Supplementary material

### Modulation of the gut microbiota modulation by galactooligosaccharide protects against heavy metal lead accumulation in mice

Qixiao Zhai<sup>1,2,4</sup>, Jing Wang<sup>1,2</sup>, Shi Cen<sup>1,2</sup>, Jianxin Zhao<sup>1,2</sup>, Hao Zhang<sup>1,2,3</sup>, Fengwei Tian<sup>1,2,4\*</sup>, Wei Chen<sup>1,2,3,5</sup>

<sup>1</sup>State Key Laboratory of Food Science and Technology, Jiangnan University, Wuxi, Jiangsu 214122, China

<sup>2</sup>School of Food Science and Technology, Jiangnan University, Wuxi, Jiangsu 214122, China.

<sup>3</sup>National Engineering Research Centre for Functional Food, Wuxi, Jiangsu 214122, China

<sup>4</sup>International Joint Research Laboratory for Probiotics at Jiangnan University, Wuxi, Jiangsu 214122, China

<sup>5</sup>Beijing Innovation Centre of Food Nutrition and Human Health, Beijing Technology and Business University (BTBU), Beijing 100048, China

\*Corresponding author:

Fengwei Tian, State Key Laboratory of Food Science and Technology, Jiangnan University, Wuxi, Jiangsu 214122, China. E-mail: [fwtian@jiangnan.edu.cn](mailto:fwtian@jiangnan.edu.cn), Phone: (86)510-85912155

## **Materials and Methods**

### **The evaluate the efficacy of the antibiotic treatment on microbiota depletion of mice**

Individual fecal samples of mice were taken at the end of antibiotic treatment. Samples were incubated in brain heart infusion and in thioglycolate broths for at least 3 days at 37°C and bacterial growth was monitored daily by turbidity assessment.<sup>1</sup> Compared to other reported antibiotic treatments that lasted for more than 4 weeks,<sup>1,2</sup> the antibiotic treatment used in the present study was in a shorter time, but sometimes failed to establish a gnotobiotic mouse model.<sup>3</sup> Only mice without cultivable gut microbiota were selected for further studies.

## Figures

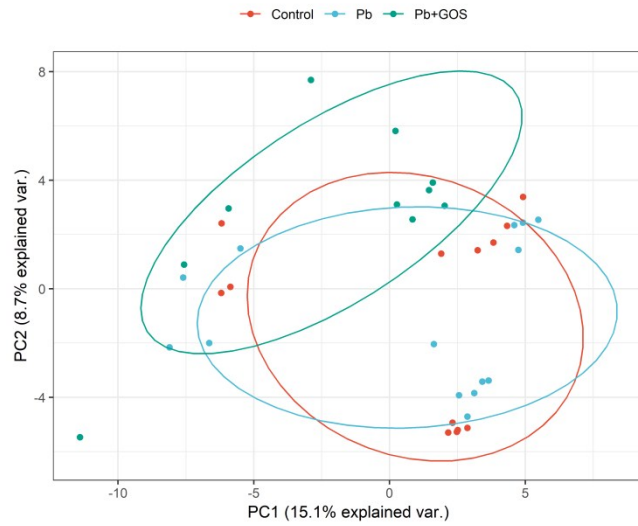

**Fig. S1** Principal component analysis (PCA) plot for the genera of gut microbiota of mice in Control, Pb, and Pb+GOS groups. The ellipse represents the confidence region for each group.

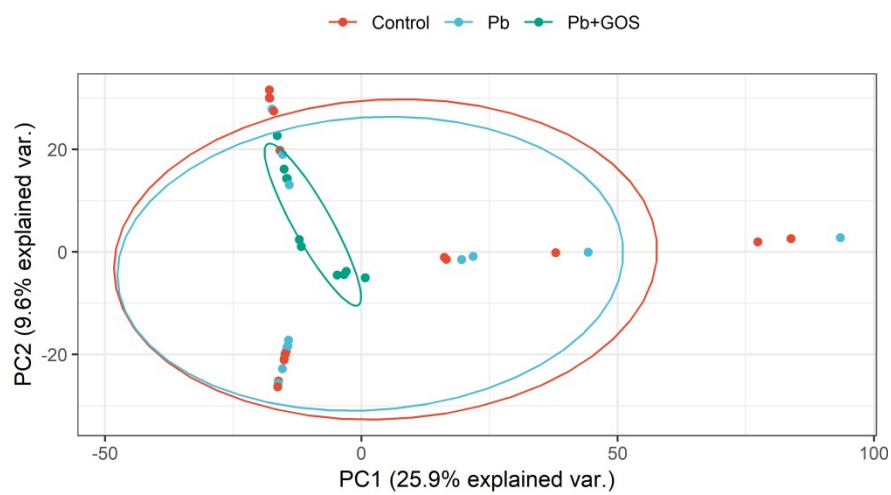

**Fig. S2** Principal component analysis (PCA) plot based on OTU relative abundance of gut microbiota of mice in Control, Pb, and Pb+GOS groups. The ellipse represents the

confidence region for each group.

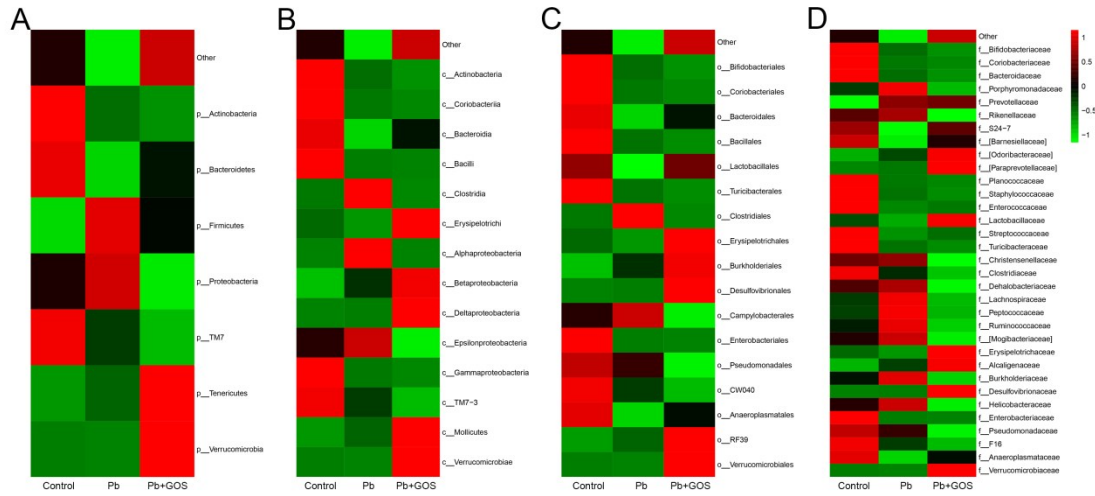

**Fig. S3** Heatmap of the microbiota composition for the phylum (A), class (B), order (C) and family (D) of mice. Red indicates increased genera and green indicates decreased genera.

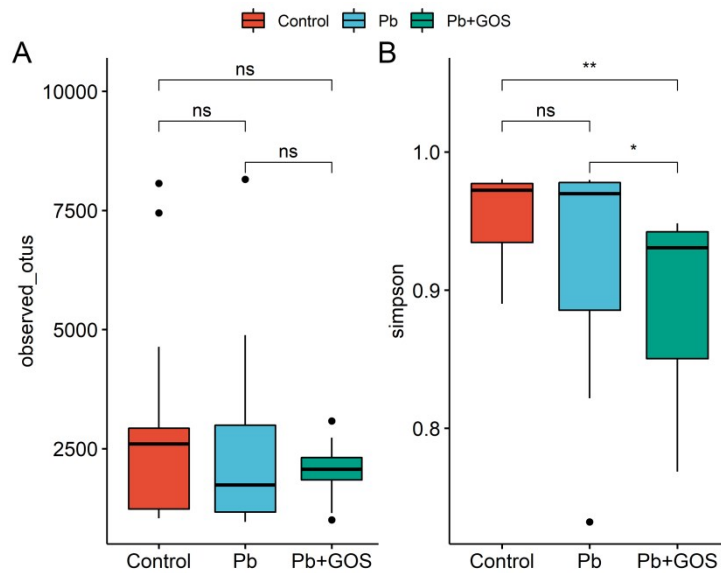

**Fig. S4** Boxplots of the Observed\_otus (A) and Simpson index (B) for the gut microbiota of mice. The upper and lower lines represent the 25% and 75% quantile values, respectively. \* and \*\* indicate significant differences ( $P < 0.05$  and  $P < 0.01$ ).

between groups. n.s. indicates no significant differences ( $P > 0.05$ ) between groups.

## References

1. M. M. Heimesaat, S. Bereswill, A. Fischer, D. Fuchs, D. Struck, J. Niebergall, H.-K. Jahn, I. R. Dunay, A. Moter and D. M. Gescher, Gram-negative bacteria aggravate murine small intestinal Th1-type immunopathology following oral infection with *Toxoplasma gondii*, *J. Immunol.*, 2006, **177**, 8785-8795.
2. S. R. Nahoum, J. Paglino, F. E. Varzaneh, S. Edberg and R. Medzhitov, Recognition of commensal microflora by Toll-Like receptors is required for intestinal homeostasis, *Cell*, 2004, **118**, 229-241.
3. X. Chen, K. Katchar, J. D. Goldsmith, N. Nanthakumar, A. Cheknis, D. N. Gerding and C. P. Kelly, A mouse model of *Clostridium difficile* - associated disease, *Gastroenterology*, 2008, **135**, 1984-1992.
